# Supplementary material for: Porous carbon quantum dots: one step green synthesis vial-cysteine and applications in metal ion detection
Source: Royal Society of Chemistry journal article supplement (doi:10.1039/c4ra11179f), 2014-11-19
Supplement: c4ra11179f1.pdf [file c4ra11179f1.pdf]

## Porous carbon quantum dots: one step green synthesis via L-cysteine and application in metal ions detection†

Deli Xiao<sup>a,1</sup>, Renfeng Pan<sup>a,1</sup>, Siqiao Li<sup>a</sup>, Jia He<sup>a</sup>, Man Qi<sup>a</sup>, Sumei Kong<sup>a</sup>, Yu Gu<sup>a</sup>, Rui Lin<sup>\*b</sup>, Hua He<sup>\*a,c,d</sup>

### Electronic Supplementary Information

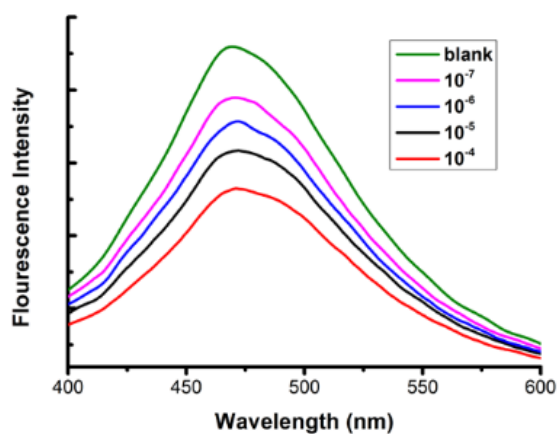

Fig.S1. FL response of CQDs upon addition of various concentration of CrO<sub>4</sub><sup>2-</sup> (0, 0.1, 1, 10 and 100 μM) in a pH 7 PBS solution.

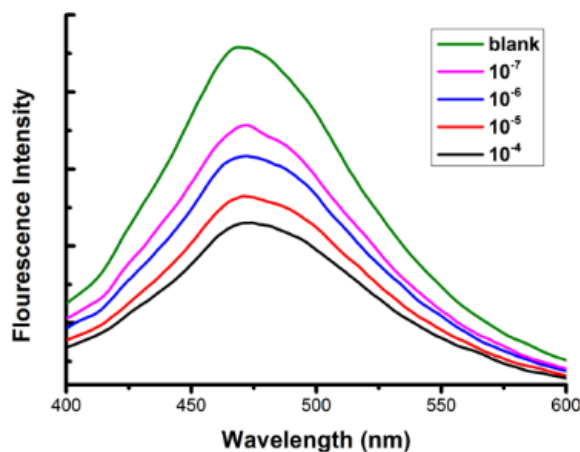

Fig.S2. FL response of CQDs upon addition of various concentration of Cr<sub>2</sub>O<sub>7</sub><sup>2-</sup> (0, 0.1, 1, 10 and 100 μM) in a pH 7 PBS solution.

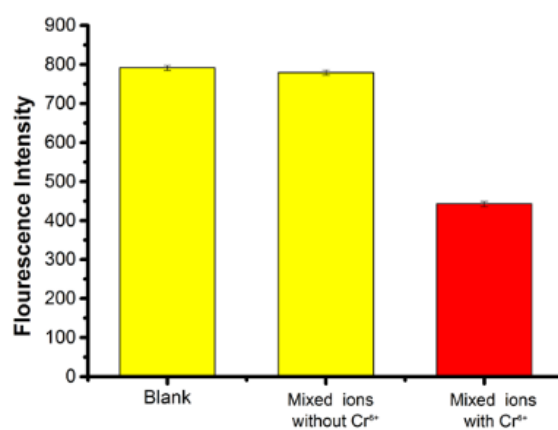

Fig.S3. The difference fluorescence signals of CQDs in the presence of all possible interference ions in 0.2 M PBS (pH 7.0, the concentration of each ion in the mixture was  $10^{-4}$  M ).
